# Supplementary material for: MicroRNA-15b regulates mitochondrial ROS production and the senescence-associated secretory phenotype through sirtuin 4/SIRT4
Source: publisher site journal article supplement (doi:10.18632/aging.100905), 2016-02-26

**Suppl. Table 1:** miRNAs differentially regulated upon TACC3 depletion in MCF7 cells thereby undergoing premature senescence.

| miRNA           | Regulation | Fold increase / decrease | P value |
|-----------------|------------|--------------------------|---------|
| hsa-miR-146b-5p | up         | 3,82                     | 0,0094  |
| hsa-miR-1977    | up         | 2,34                     | 0,0345  |
| hsa-miR-181a*   | up         | 2,20                     | 0,0174  |
| hsa-miR-193b*   | up         | 2,14                     | 0,0243  |
| hsa-miR-141     | up         | 1,98                     | 0,0046  |
| hsa-miR-1973    | up         | 1,92                     | 0,0229  |
| hsa-miR-29b-1*  | up         | 1,77                     | 0,0033  |
| hsa-miR-125b    | up         | 1,72                     | 0,0322  |
| hsa-miR-21*     | up         | 1,71                     | 0,0213  |
| hsa-miR-491-3p  | up         | 1,69                     | 0,0001  |
| hsa-miR-30c     | up         | 1,68                     | 0,0203  |
| hsa-miR-200a*   | up         | 1,64                     | 0,0189  |
| hsa-miR-30e     | up         | 1,54                     | 0,0450  |
| hsa-miR-200c*   | up         | 1,53                     | 0,0424  |
| hsa-miR-1275    | up         | 1,53                     | 0,0002  |
| hsa-miR-183*    | down       | 3,34                     | 0,0037  |
| hsa-miR-501-3p  | down       | 2,65                     | 0,0046  |
| hsa-miR-345     | down       | 2,63                     | 0,0140  |
| hsa-miR-18a     | down       | 2,27                     | 0,0071  |
| hsa-miR-194     | down       | 2,07                     | 0,0429  |
| hsa-miR-33a     | down       | 2,06                     | 0,0005  |
| hsa-miR-218     | down       | 1,99                     | 0,0341  |
| hsa-miR-32      | down       | 1,94                     | 0,0046  |
| hsa-miR-17      | down       | 1,93                     | 0,0205  |
| hsa-miR-18b     | down       | 1,84                     | 0,0169  |
| hsa-miR-19a     | down       | 1,83                     | 0,0115  |
| hsa-miR-19b     | down       | 1,83                     | 0,0109  |
| hsa-miR-7       | down       | 1,82                     | 0,0388  |
| hsa-miR-192     | down       | 1,77                     | 0,0072  |
| hsa-miR-19b-1*  | down       | 1,75                     | 0,0011  |
| hsa-miR-101     | down       | 1,70                     | 0,0301  |
| hsa-miR-362-3p  | down       | 1,70                     | 0,0051  |
| hsa-miR-769-5p  | down       | 1,64                     | 0,0164  |
| hsa-miR-20a     | down       | 1,62                     | 0,0339  |
| hsa-miR-15b     | down       | 1,61                     | 0,0207  |
| hsa-miR-590-5p  | down       | 1,57                     | 0,0243  |
| hsa-miR-503     | down       | 1,54                     | 0,0283  |
| hsa-miR-219-5p  | down       | 1,52                     | 0,0284  |

Analysis of differentially expressed miRNAs using the Genespring software (ver11) (expression changes  $\geq 1.5$ -fold were determined four days after DOX-induced TACC3 shRNA expression that triggers premature senescence;  $p \leq 0.05$ ; student's t-test).

**Suppl. Table 2:** Overview of the number of differentially regulated, putative miRNA target genes vs. the total number of candidate miRNA target genes.

|           | miRNA                     | Differentially regulated putative target genes | Candidate target genes (total) | P value         |
|-----------|---------------------------|------------------------------------------------|--------------------------------|-----------------|
| <b>1</b>  | <b>hsa-miR-17</b>         | <b>138</b>                                     | <b>1601</b>                    | <b>0,000011</b> |
| <b>2</b>  | <b>hsa-miR-20a</b>        | <b>138</b>                                     | <b>1594</b>                    | <b>0,000008</b> |
| <b>3</b>  | <b>hsa-miR-30e</b>        | <b>129</b>                                     | <b>1445</b>                    | <b>0,000004</b> |
| <b>4</b>  | <b>hsa-miR-30c</b>        | <b>124</b>                                     | <b>1440</b>                    | <b>0,000031</b> |
| <b>5</b>  | <b>hsa-miR-19a</b>        | <b>124</b>                                     | <b>1385</b>                    | <b>0,000004</b> |
| <b>6</b>  | <b>hsa-miR-19b</b>        | <b>124</b>                                     | <b>1383</b>                    | <b>0,000004</b> |
| <b>7</b>  | <b><i>hsa-miR-15b</i></b> | <b>108</b>                                     | <b>1359</b>                    | <b>0,001533</b> |
| 8         | hsa-miR-21*               | 99                                             | 1345                           | 0,021258        |
| <b>9</b>  | <b>hsa-miR-32</b>         | <b>96</b>                                      | <b>992</b>                     | <b>0,000002</b> |
| 10        | hsa-miR-218               | 75                                             | 928                            | 0,005707        |
| 11        | hsa-miR-101               | 65                                             | 855                            | 0,032452        |
| 12        | hsa-miR-125b              | 61                                             | 845                            | 0,088203        |
| <b>13</b> | <b>hsa-miR-7</b>          | <b>53</b>                                      | <b>473</b>                     | <b>0,000007</b> |
| 14        | hsa-miR-503               | 35                                             | 355                            | 0,002857        |
| 15        | hsa-miR-18a               | 32                                             | 320                            | 0,003698        |
| 16        | hsa-miR-18b               | 32                                             | 320                            | 0,003698        |
| 17        | hsa-miR-590-5p            | 30                                             | 307                            | 0,006633        |
| 18        | hsa-miR-219-5p            | 29                                             | 417                            | 0,342896        |
| 19        | hsa-miR-491-3p            | 25                                             | 278                            | 0,028984        |
| 20        | hsa-miR-194               | 23                                             | 363                            | 0,651865        |
| 21        | hsa-miR-362-3p            | 21                                             | 327                            | 0,634296        |
| 22        | hsa-miR-146b-5p           | 20                                             | 168                            | 0,002443        |
| 23        | hsa-miR-33a               | 15                                             | 376                            | 0,148934        |
| 24        | hsa-miR-192               | 13                                             | 125                            | 0,051686        |
| 25        | hsa-miR-345               | 11                                             | 140                            | 0,277760        |
| 26        | hsa-miR-501-3p            | 9                                              | 241                            | 0,211704        |
| 27        | hsa-miR-769-5p            | 7                                              | 126                            | 1,000000        |
| 28        | hsa-miR-1275              | 3                                              | 90                             | 0,493812        |

Analysis of putative target mRNAs differentially regulated by miRNAs was performed using the Genespring software (ver11). Expression changes  $\geq 1.75$  were determined four days after DOX-induced TACC3 shRNA expression and senescence induction ( $p \leq 0.05$ ; student's t-test). As indicated in the last column, significant correlations between the total number of putative target mRNAs vs. the number of differentially expressed candidate target mRNAs were determined using Fisher's exact test ( $p \leq 0.05$ ) and a Bonferroni correction (highly significant miRNA-mRNA correlations with  $p \leq 0.0018$  are indicated in bold).

**A**

TACC3 depletion  
(TACC3 shRNA vs. control shRNA, day 4 of DOX treatment)

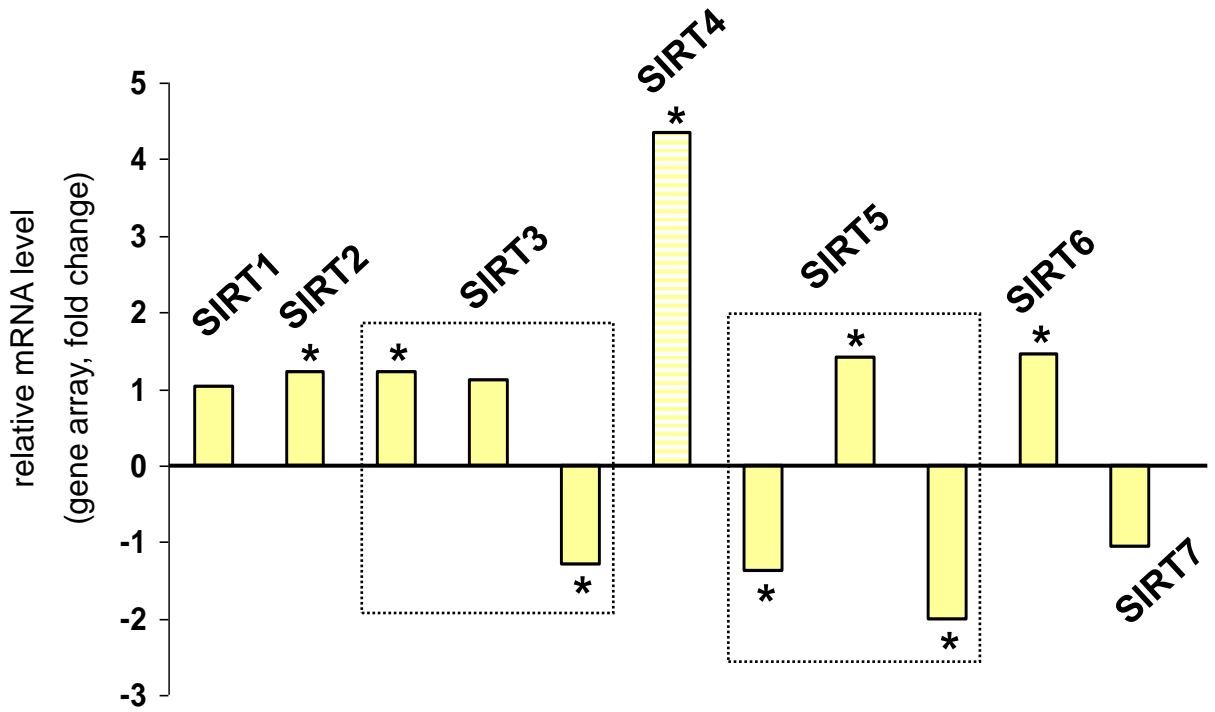**B**

$\gamma$ IR (20 Gy) vs. control (day 4)

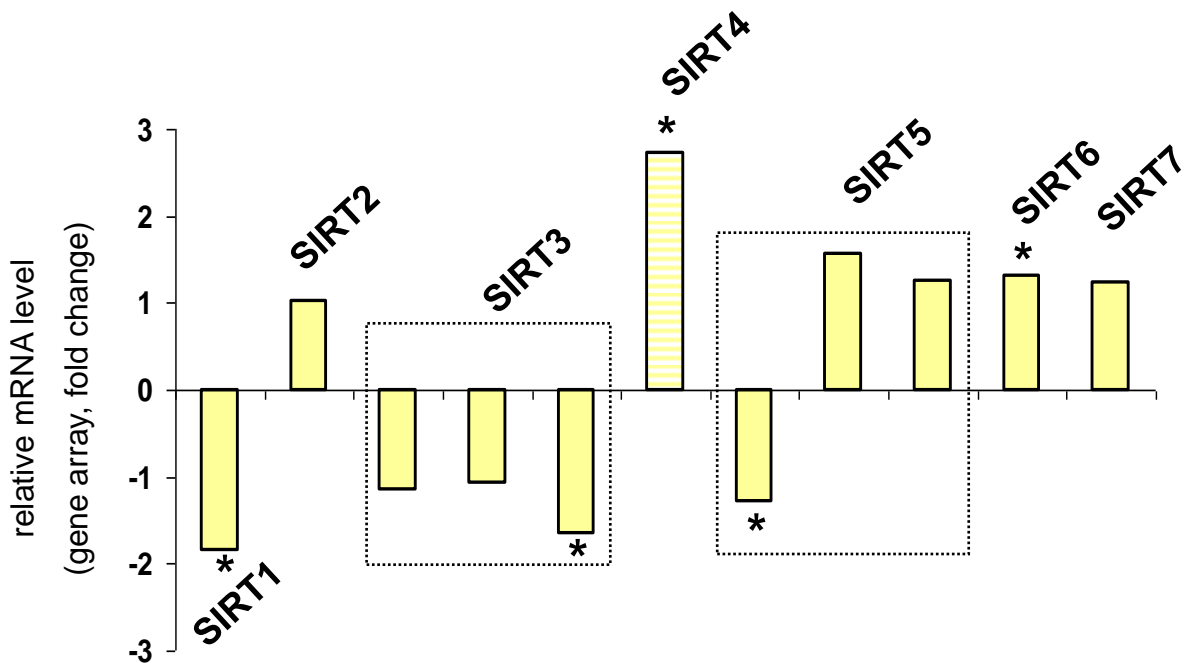

# Merge (MTCO2 / SIRT4)

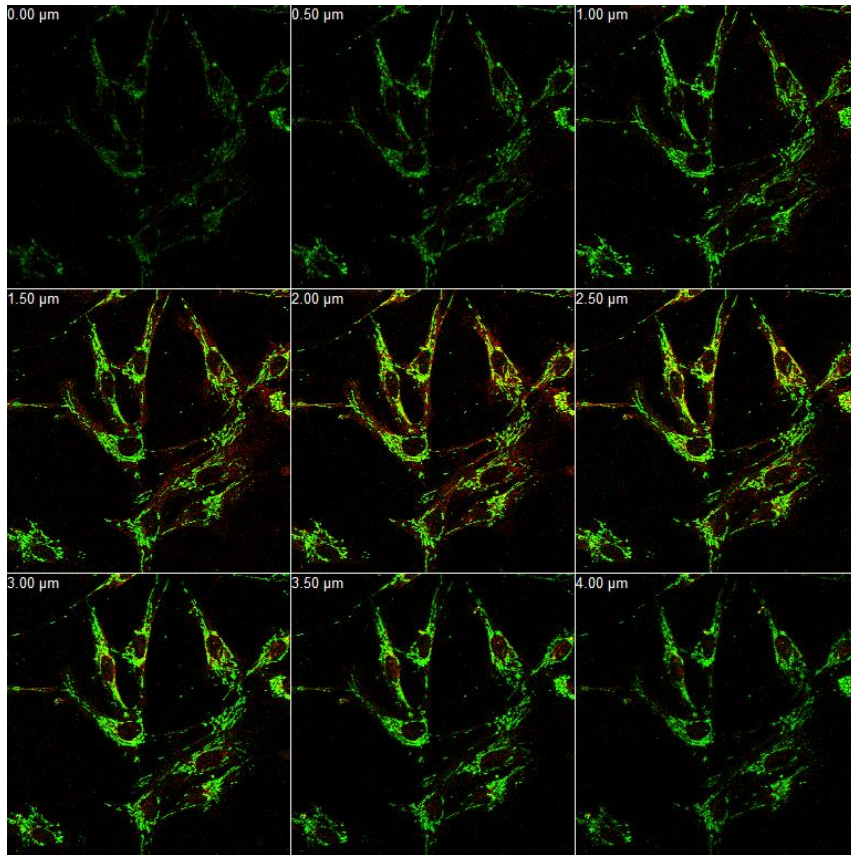

sham

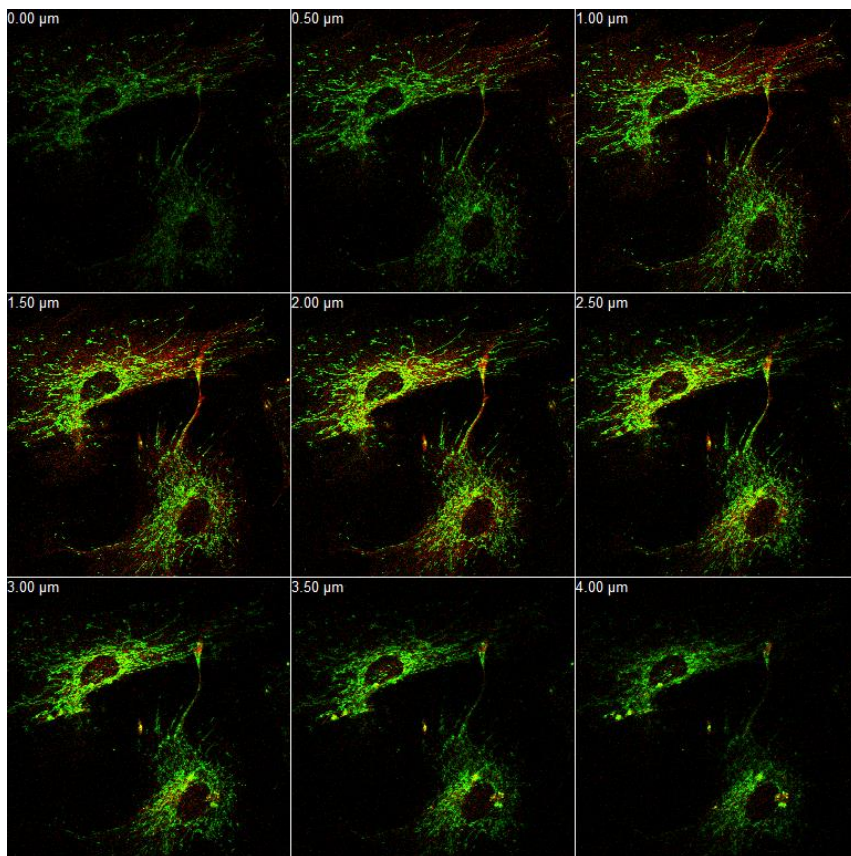

$\gamma$ IR

suppl. Figure 2

**A**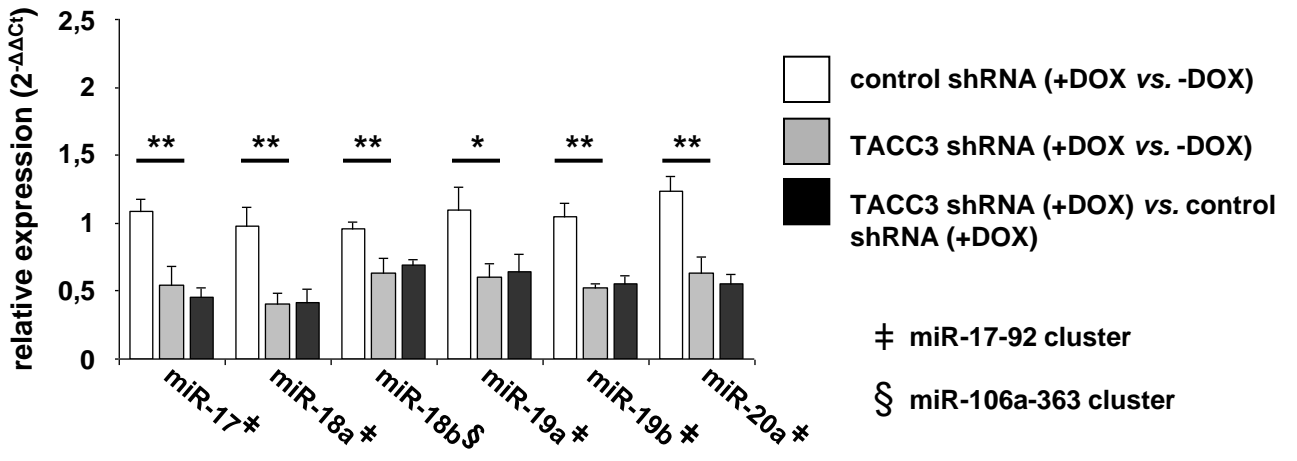**B**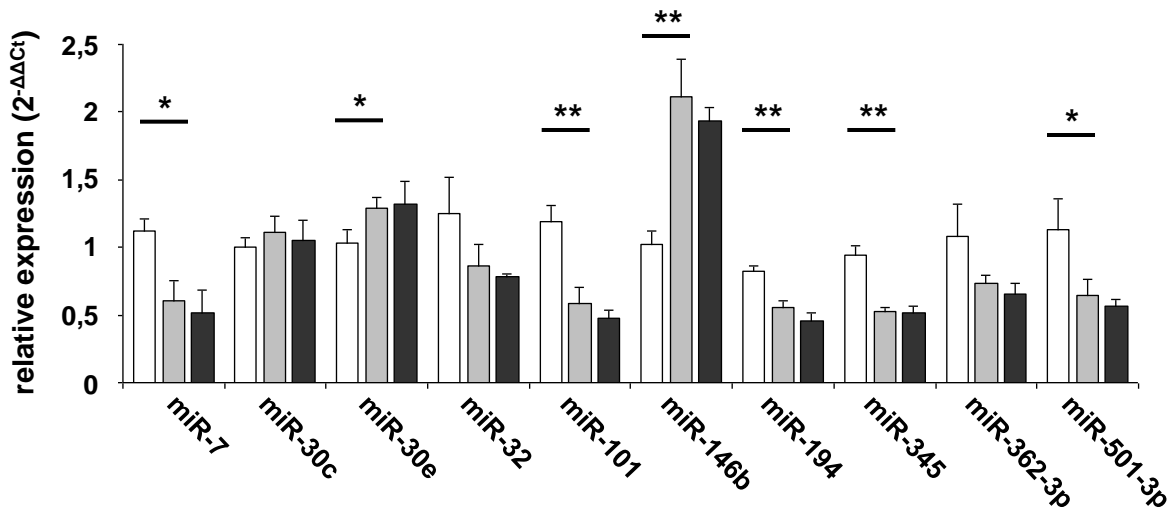

**A**

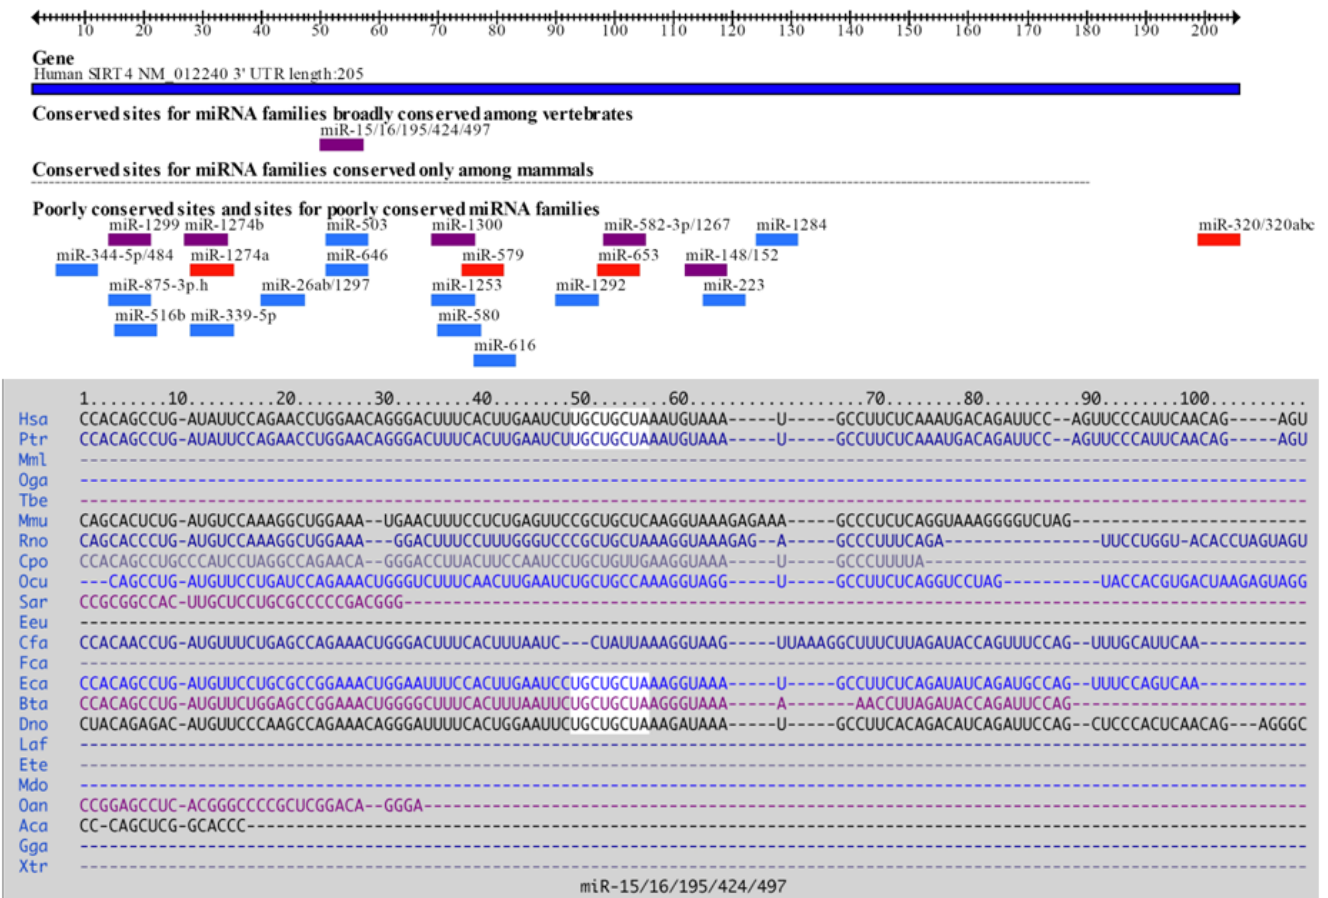

[http://www.targetscan.org/cgi-bin/vert\\_50/view\\_gene.cgi?gs=SIRT4&taxid=9606&members=&showcnc=1&shownc=1](http://www.targetscan.org/cgi-bin/vert_50/view_gene.cgi?gs=SIRT4&taxid=9606&members=&showcnc=1&shownc=1)

**B**

**Human SIRT4 3' UTR miRNA Table** [Sort table by aggregate  $P_{CT}$ ]  
 Table sorted by total context score

miRNA families broadly conserved among vertebrates

| miRNA                 | conserved sites |      |         |         | poorly conserved sites |      |         |         | Total Context score | Aggregate $P_{CT}$ |
|-----------------------|-----------------|------|---------|---------|------------------------|------|---------|---------|---------------------|--------------------|
|                       | Total           | 8mer | 7mer-m8 | 7mer-1A | Total                  | 8mer | 7mer-m8 | 7mer-1A |                     |                    |
| miR-15/16/195/424/497 | 1               | 1    | 0       | 0       | 0                      | 0    | 0       | 0       | -0.47               | < 0.1              |
| miR-148/152           | 0               | 0    | 0       | 0       | 1                      | 1    | 0       | 0       | -0.32               | 0.22               |
| miR-503               | 0               | 0    | 0       | 0       | 1                      | 0    | 0       | 1       | -0.20               | < 0.1              |
| miR-26ab/1297         | 0               | 0    | 0       | 0       | 1                      | 0    | 0       | 1       | -0.16               | < 0.1              |
| miR-223               | 0               | 0    | 0       | 0       | 1                      | 0    | 0       | 1       | -0.13               | 0.20               |

[http://www.targetscan.org/cgi-bin/vert\\_50/view\\_genetable.cgi?gs=SIRT4&taxid=9606&members=&showcnc=1&shownc=1&sortText=cs](http://www.targetscan.org/cgi-bin/vert_50/view_genetable.cgi?gs=SIRT4&taxid=9606&members=&showcnc=1&shownc=1&sortText=cs)

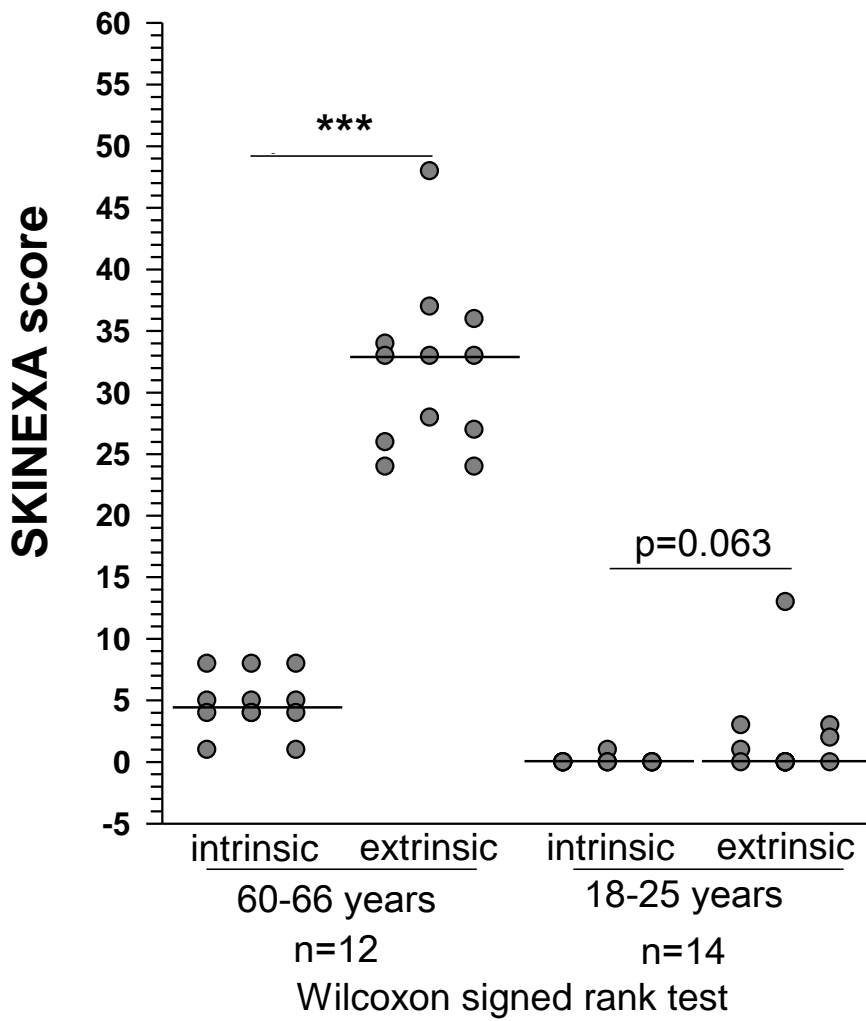

**A**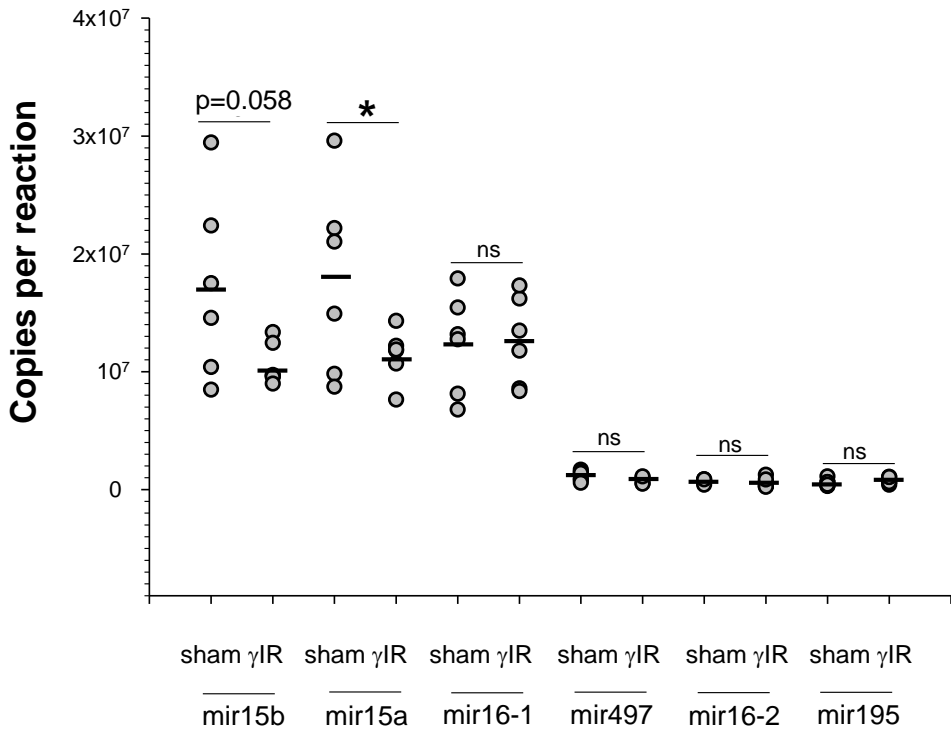**B**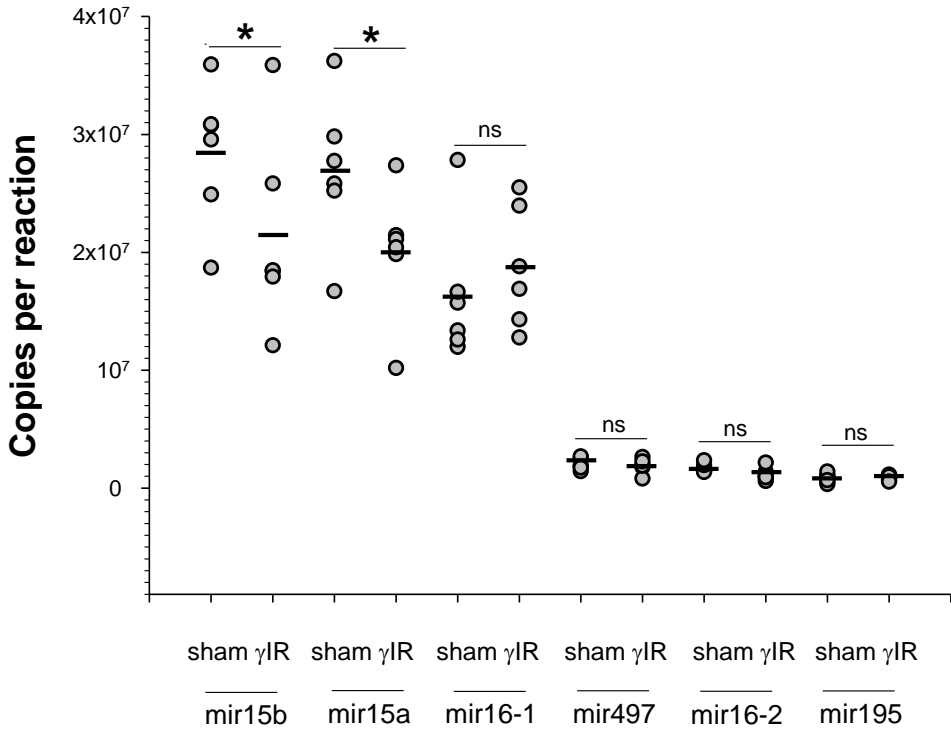



**A**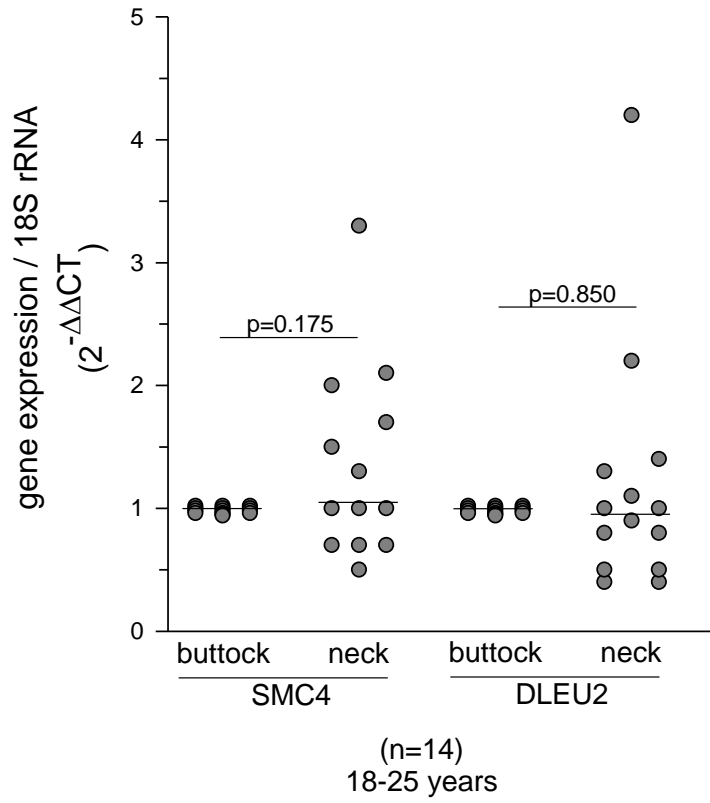**B**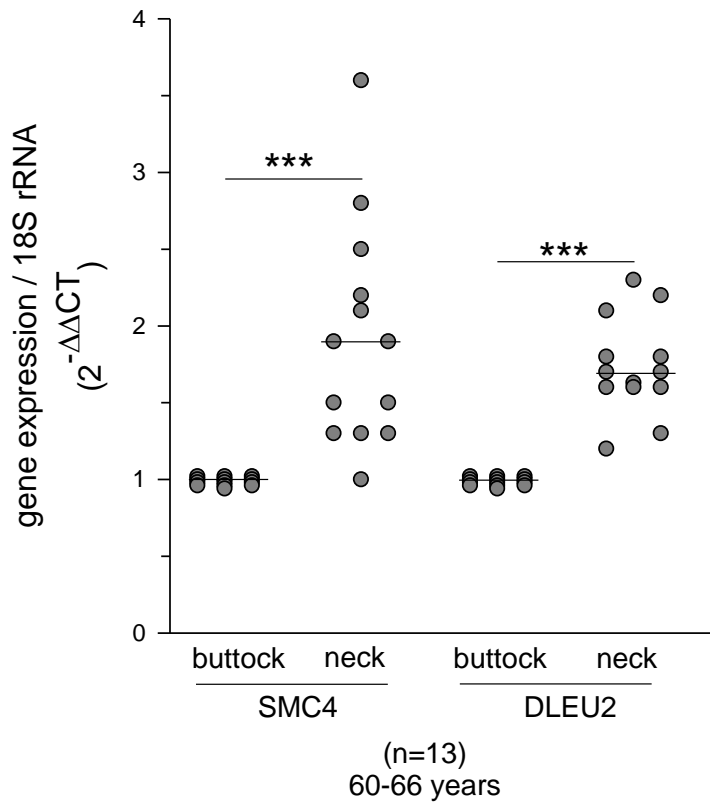

**A**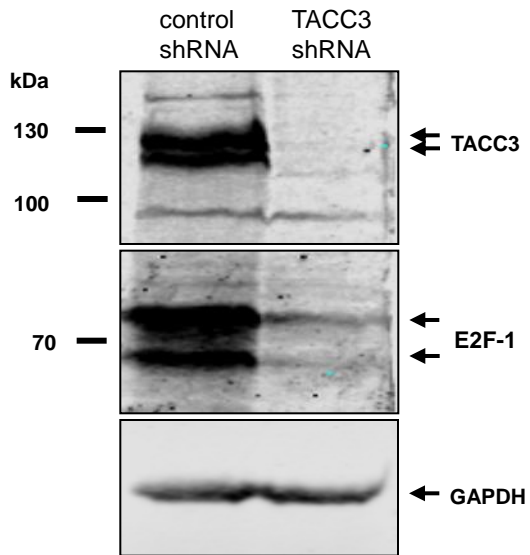**B**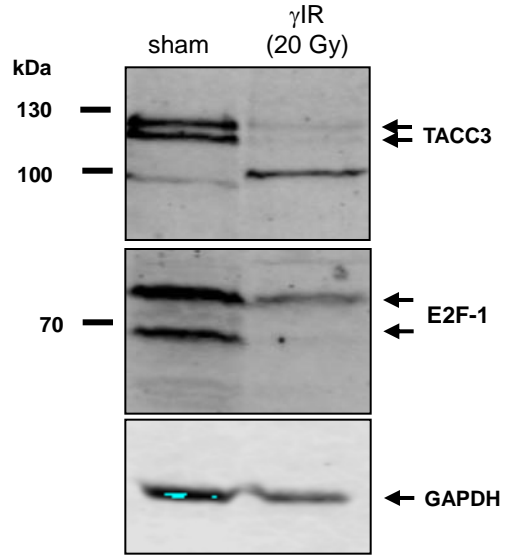

**A**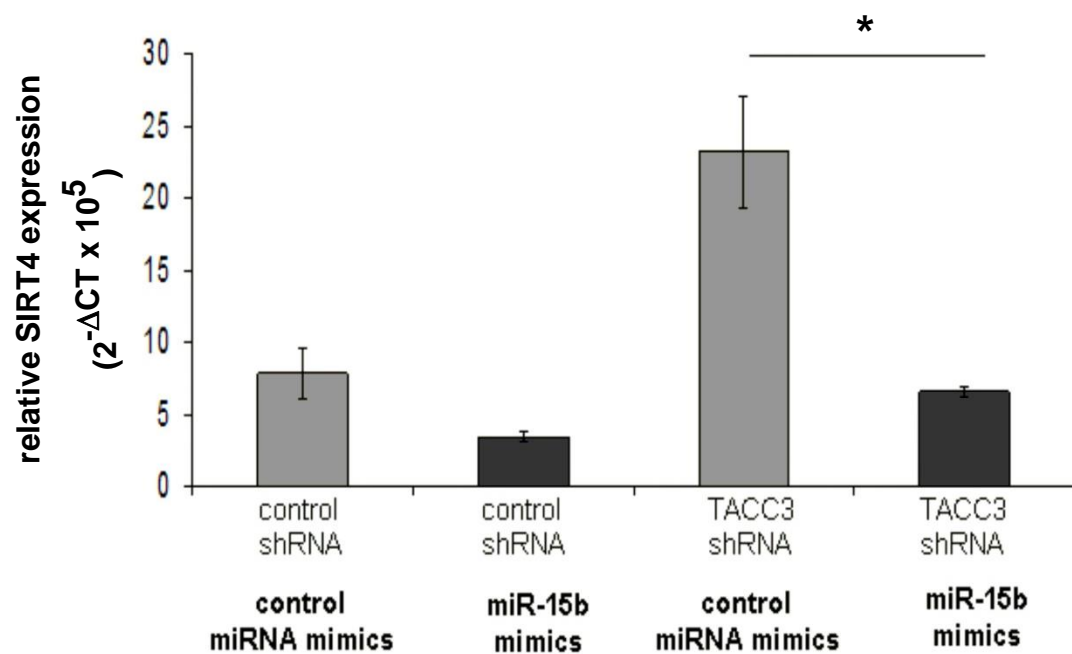**B**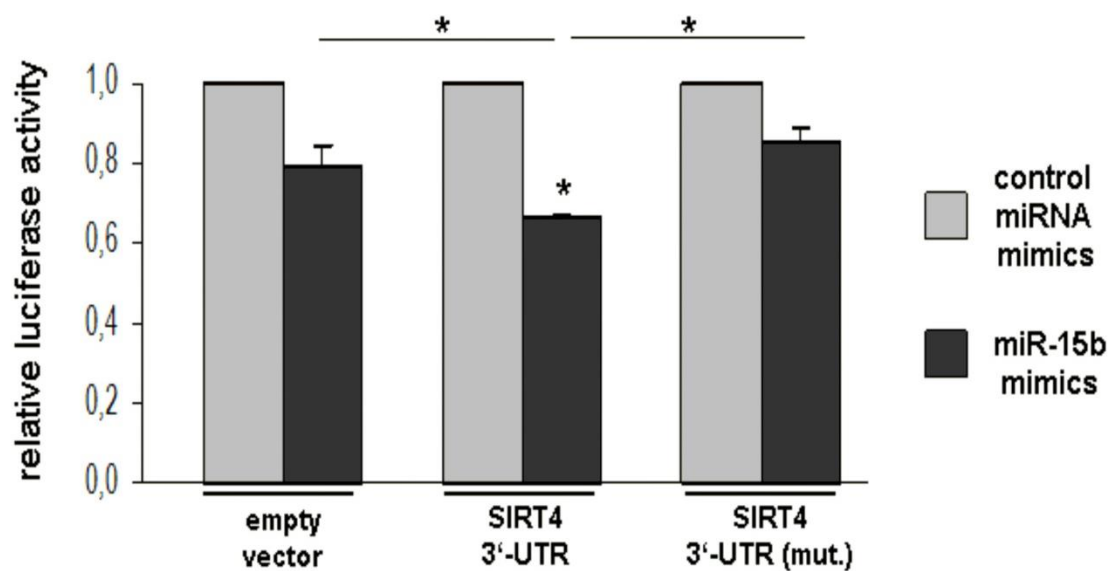

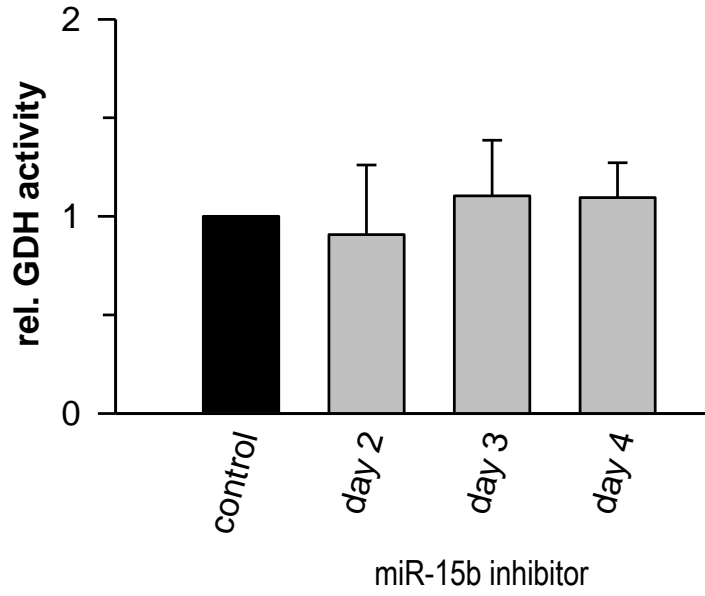

Supplement: Supplementary file [file aging-v8i3-100905-supplementary-material-SD2.pdf]
