# Supplementary material for: MicroRNA-15b regulates mitochondrial ROS production and the senescence-associated secretory phenotype through sirtuin 4/SIRT4
Source: publisher site journal article supplement (doi:10.18632/aging.100905), 2016-02-26
Supplement: Supplementary file [file aging-v8i3-100905-supplementary-material-SD3.pdf]

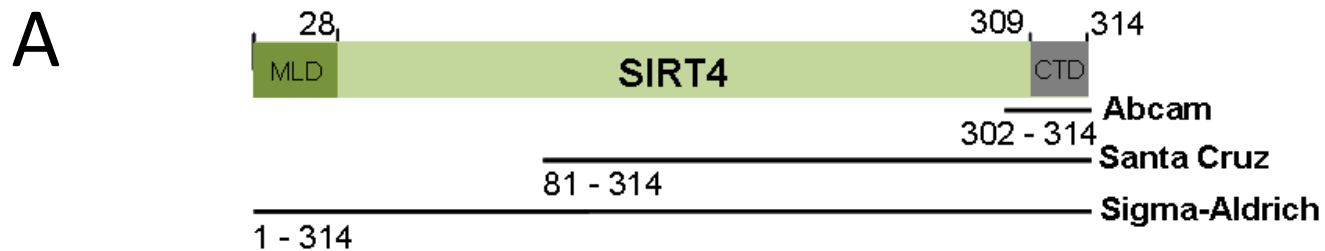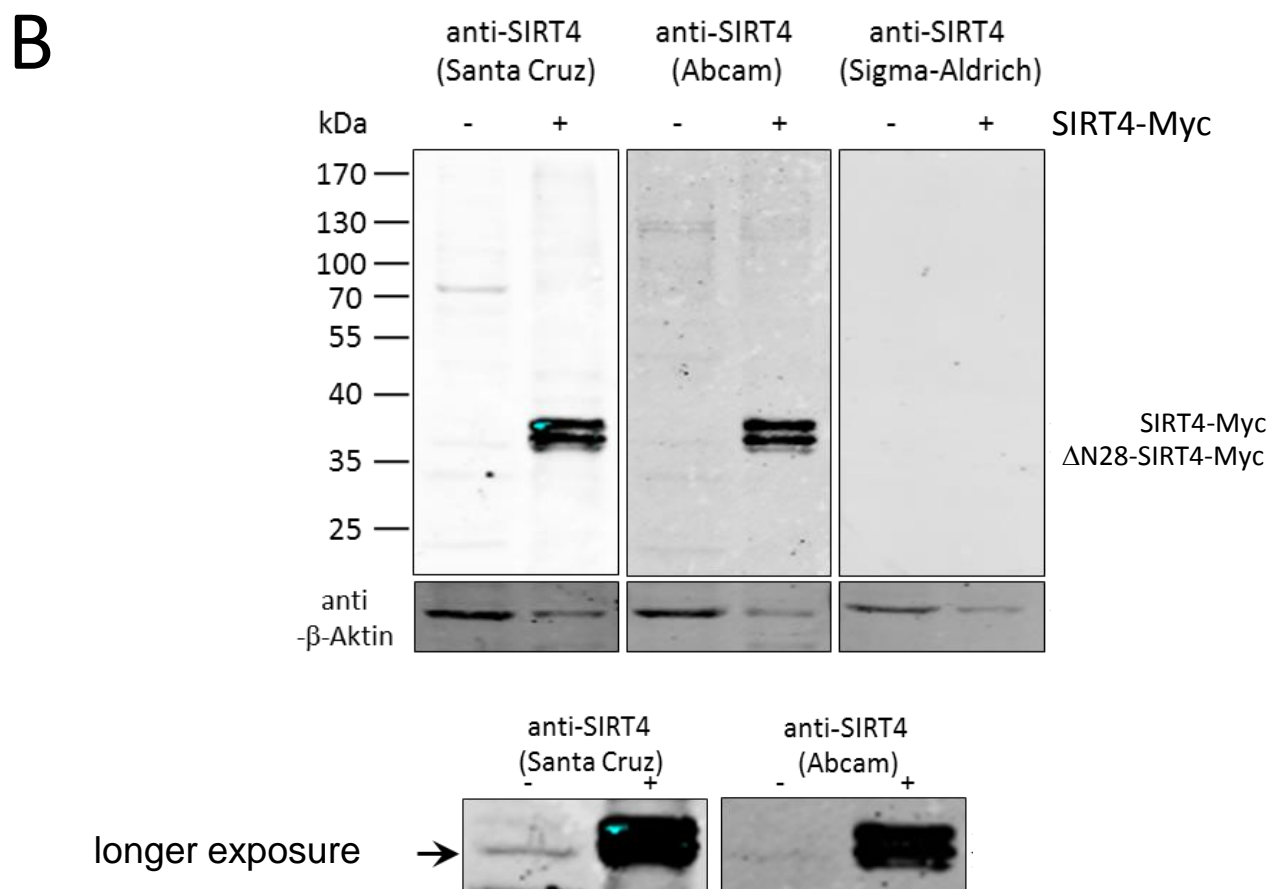

**Figure 1**  
**(for referee's use only)**

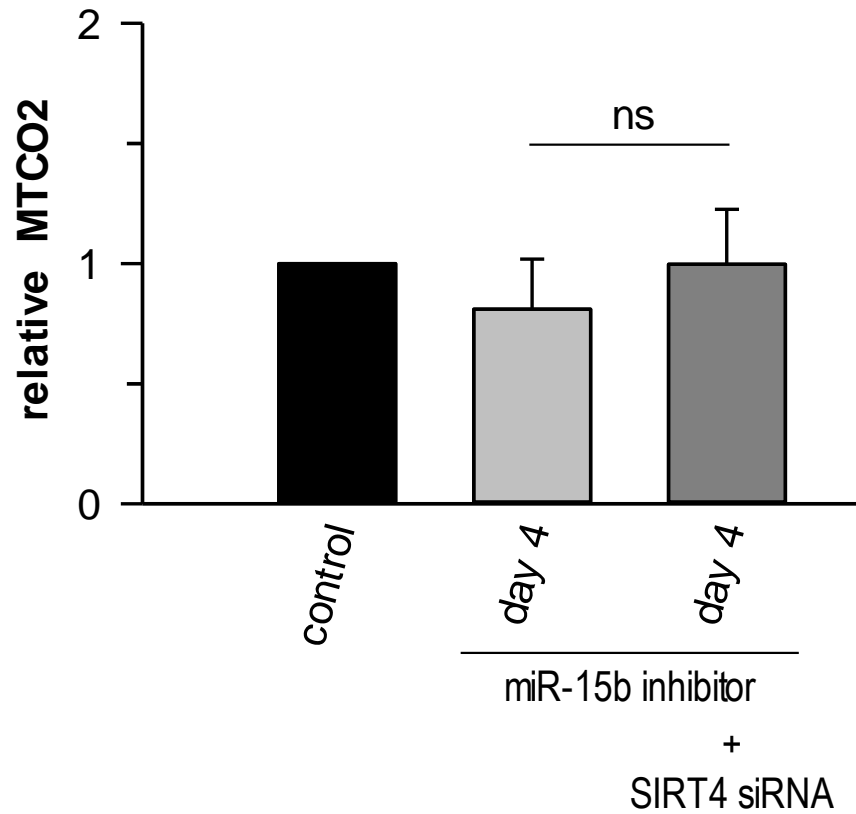

**Figure 2**  
**(for referee's use only)**

**TGCTGCT**

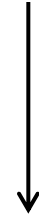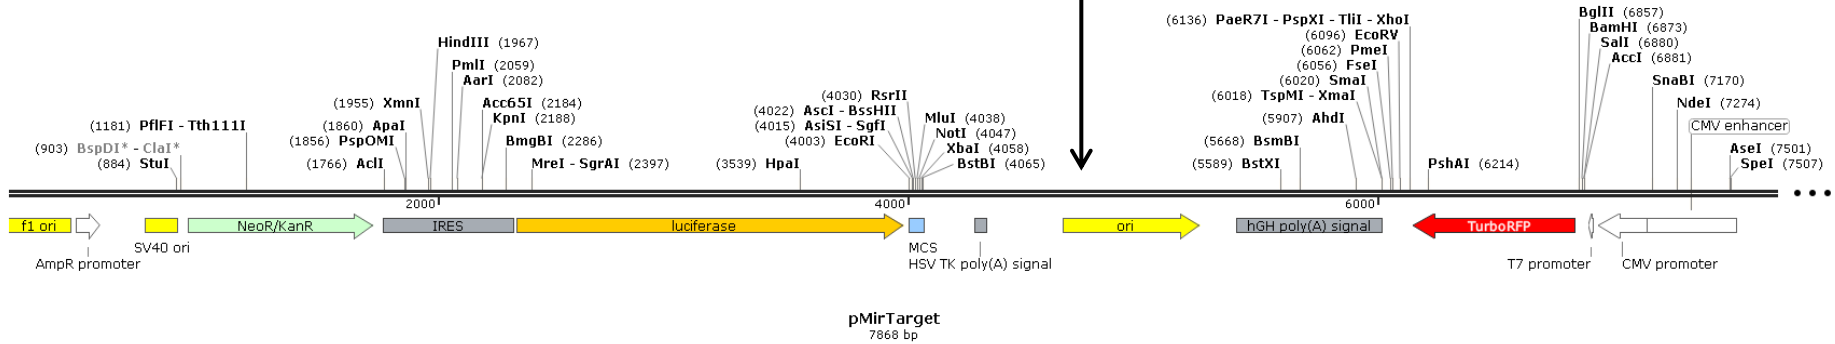

Complete seed seq. for miR-15b: 5'-TGCTGCTA-3'

**Figure 3**  
(for referee's use only)
